# Supplementary material for: Catalytic synthesis of non-carbon fuel NH3 from easily available N2 and H2O over FeO(100) surface: study of reaction mechanism using the density functional theory
Source: Royal Society of Chemistry journal article supplement (doi:10.1039/c9nj02208b), 2019-01-01
Supplement: c9nj02208b2.pdf [file c9nj02208b2.pdf]

**Title:** Catalytic synthesis of non-carbon fuel  $\text{NH}_3$  from easily available  $\text{N}_2$  and  $\text{H}_2\text{O}$   
over  $\text{FeO}(100)$  surface: Reaction mechanism with density functional theory study

**Authors:** Xin Song,<sup>†</sup> Lina Sun,<sup>†</sup> Ping Ning, Chi Wang, Xin Sun, Kai Li\* and  
Maohong Fan\*

**Journal:** New Journal of Chemistry

## Electronic Supplementary Information

### Figure

### Figure Captions

**Fig. S1.** Outlet gas concentration of NH<sub>3</sub> and N<sub>2</sub> over FeO in NH<sub>3</sub> synthesis process (reaction temperature = 600 °C; GHSV = 3000 h<sup>-1</sup>; inlet N<sub>2</sub> in Ar = 2%; inlet H<sub>2</sub>O in Ar = 5%)

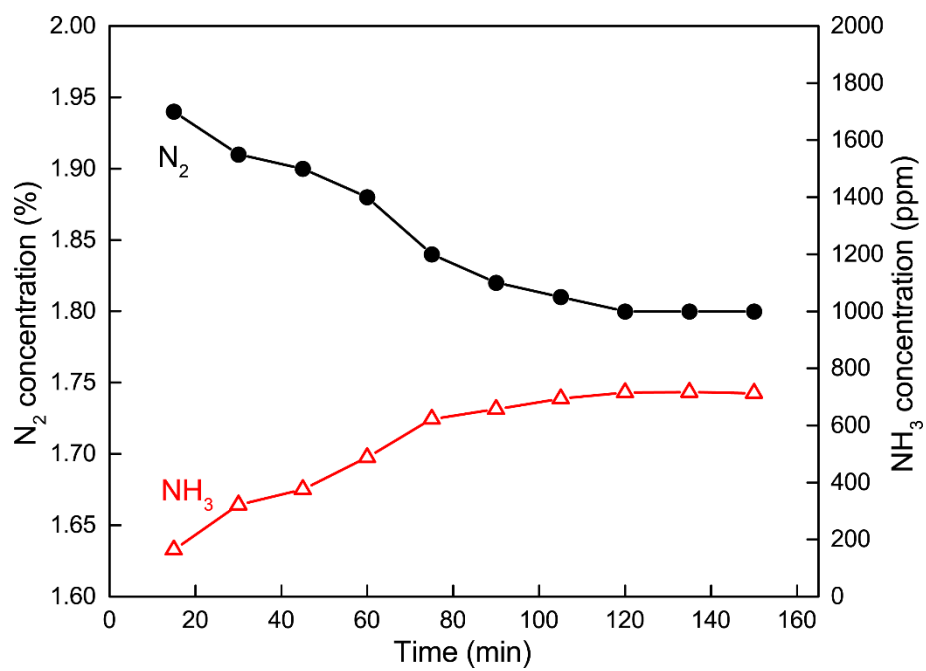

**Fig. S1**
