# Supplementary figures and images for: Catalytic synthesis of non-carbon fuel NH3 from easily available N2 and H2O over FeO(100) surface: study of reaction mechanism using the density functional theory
Source: Royal Society of Chemistry journal article supplement (doi:10.1039/c9nj02208b), 2019-01-01

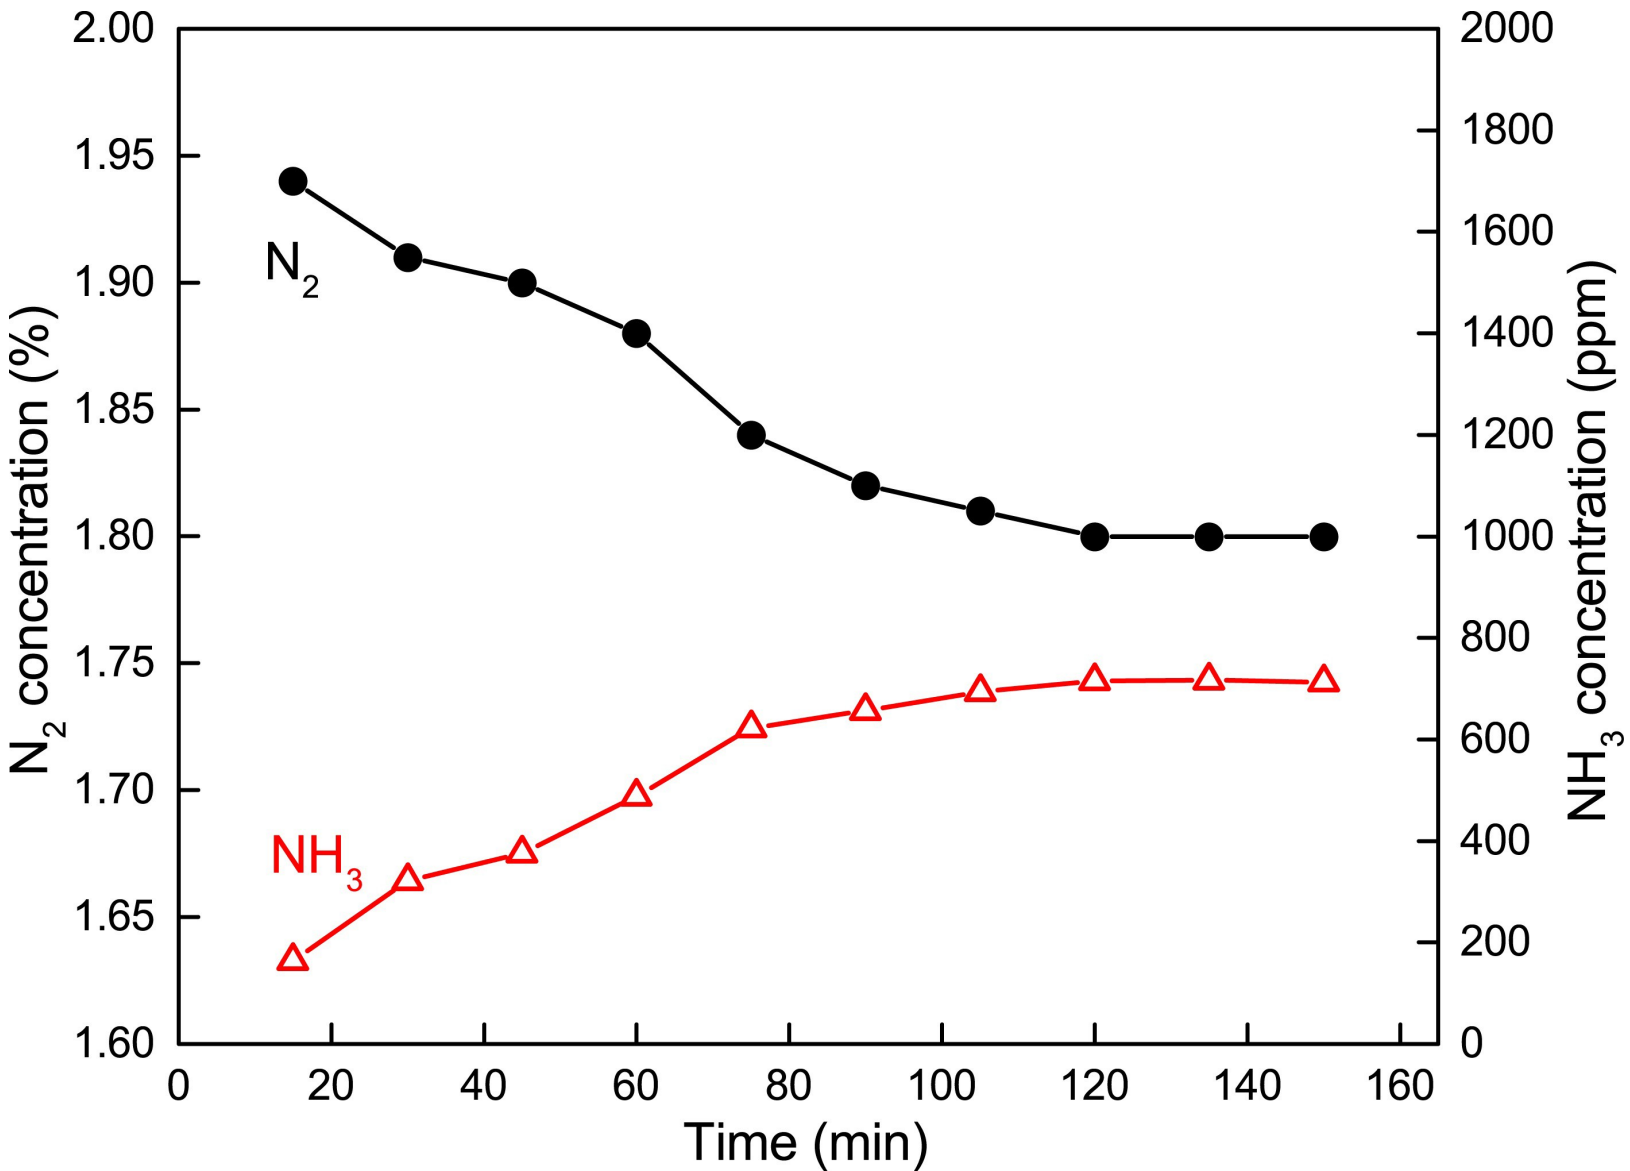

Supplement: c9nj02208b3.pdf [file c9nj02208b3.pdf]
